# Supplementary material for: Tuning the void volume in a series of isomorphic porous metal–organic frameworks by varying the solvent size and length of organic ligands
Source: Royal Society of Chemistry journal article supplement (doi:10.1039/c4ce00347k), 2014-01-01
Supplement: c4ce00347k1.pdf [file c4ce00347k1.pdf]

Supplementary Material (ESI) for CrystEngComm.

**Tuning the void volume in a series of isomorphous porous metal-organic frameworks by varying solvent size and length of organic ligand**

**Yuan-Chun He,<sup>a</sup> Jiao Guo,<sup>b</sup> Hong-Mei Zhang,<sup>a</sup> Jian-Fang Ma<sup>\*a</sup> and Ying-Ying Liu<sup>\*a</sup>**

<sup>a</sup> *Key Lab of Polyoxometalate Science, Department of Chemistry, Northeast Normal University, Changchun 130024, People's Republic of China*

<sup>b</sup> *College of Chemistry and Chemical Engineering, Xinxiang University, Xinxiang, Henan 453003, People's Republic of China*

**Materials and General Methods**

Powder X-ray diffractions were conducted on a Rigaku Dmax 2000 X-ray diffractometer with graphite monochromatized Cu K $\alpha$  radiation ( $\lambda = 0.154$  nm) at  $2\theta$  ranging from 5 to 50°. The C, H and N elemental analyses were measured on a Perkin–Elmer 2400 elemental analyzer. IR-spectra were carried out on a Mattson Alpha-Centauri spectrometer at the range of 4000–400 cm<sup>-1</sup>. The photoluminescent properties of compounds were measured on an FLSP920 Edinburgh Fluorescence Spectrometer at room temperature.

**X-ray crystallography**

Single-crystal X-ray diffraction data for **1–6** were recorded on an Oxford Gemini R Ultra diffractometer with graphite-monochromated Mo-K $\alpha$  radiation ( $\lambda = 0.71073$  Å) at 293 K. All the structures were solved by Direct Method of SHELXS-97 and refined by full-matrix least-squares techniques using the SHELXL-97 program within WINGX.<sup>1</sup> Non-hydrogen atoms were refined anisotropically, and hydrogen atoms were located at their calculated positions. The disordered atoms in compounds **1** (C13, C17, N6, and N7), **2** (C17, NC1, and NC2), and **5** (C14, C18, C22, N14, N15, and N16) were refined using C and N atoms split over two sites, with a total occupancy of 1. Some solvent hydrogen atoms in compounds **1** and **5** were not included in the model.

**References**

- 1 (a) G. M. Sheldrick, SHELXL-97, *Programs for X-ray Crystal Structure Solution*; University of Göttingen: Göttingen, Germany, 1997. (b) G. M. Sheldrick, SHELXL-97, *Programs for X-ray Crystal Structure Refinement*; University of Göttingen: Göttingen, Germany, 1997. (c) L. J. Farrugia, WINGX: *A Windows Program for Crystal Structure Analysis*; University of Glasgow:

Glasgow, UK, 1988.

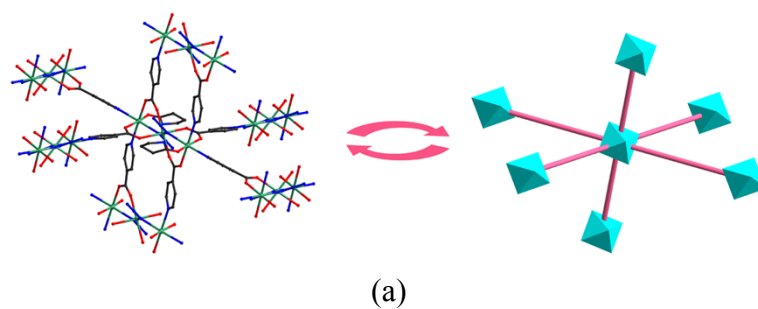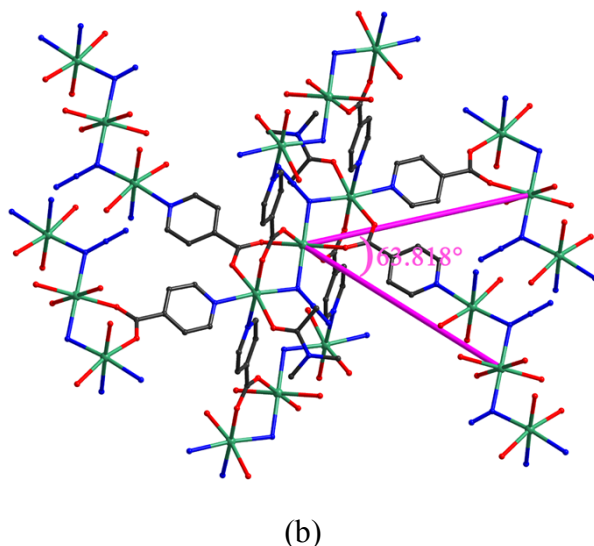

**Fig. S1** (a) View of the 6-connected node. (b) View of the angle  $\eta$  between two adjacent single bridges.

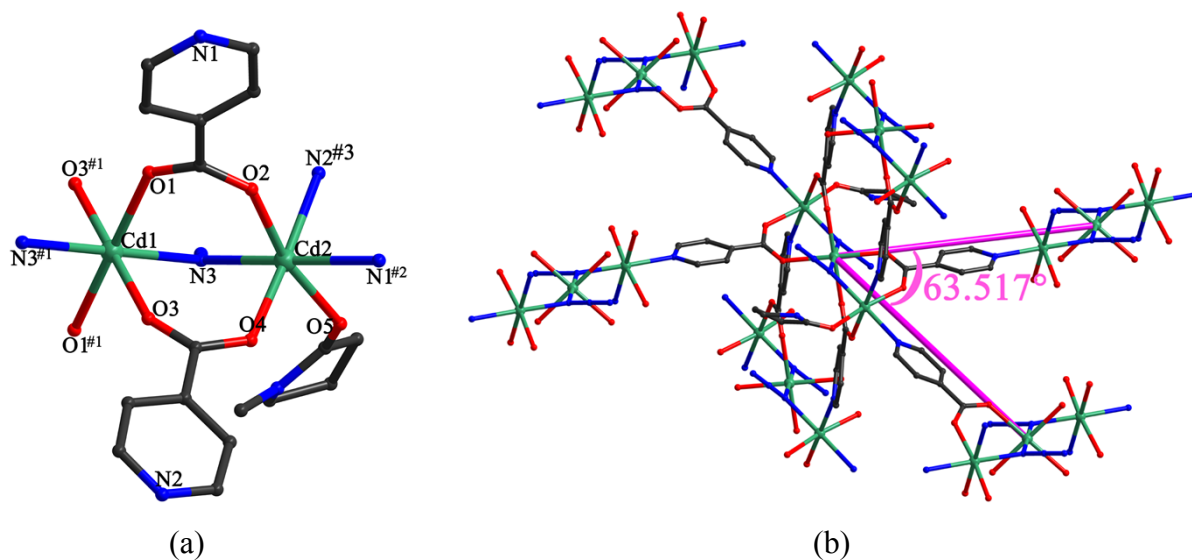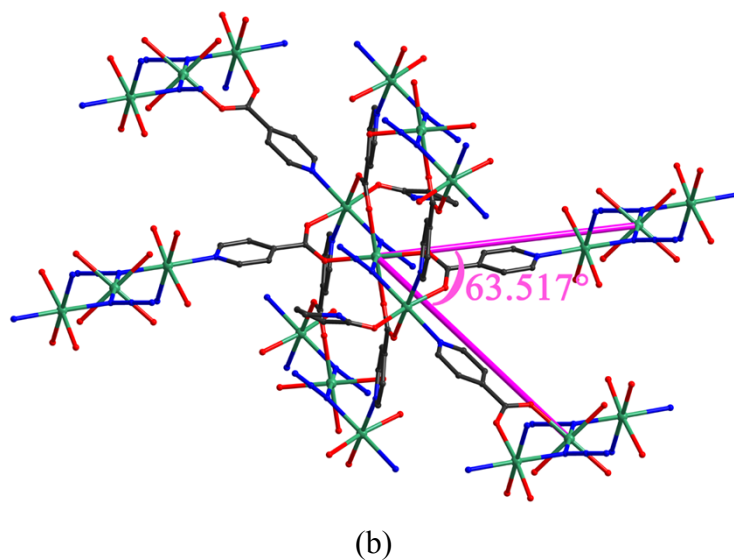

**Fig. S2** (a) Coordination environments of Cd(II) cations in 2. (b) View of angle  $\eta$  between two adjacent single bridges.

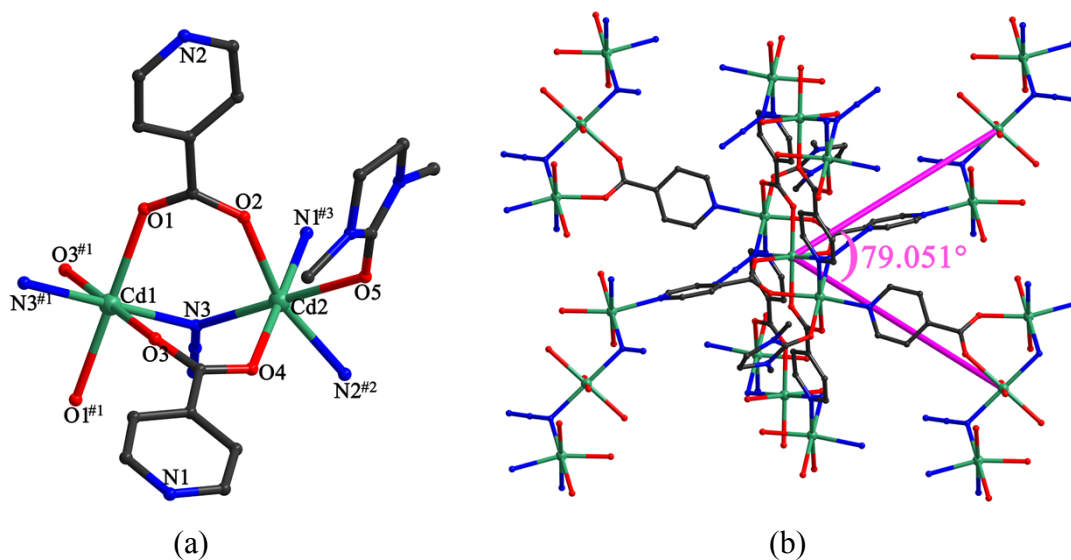

**Fig. S3** (a) Coordination environments of Cd(II) cations in **3**. (b) View of angle  $\eta$  between two adjacent single bridges.

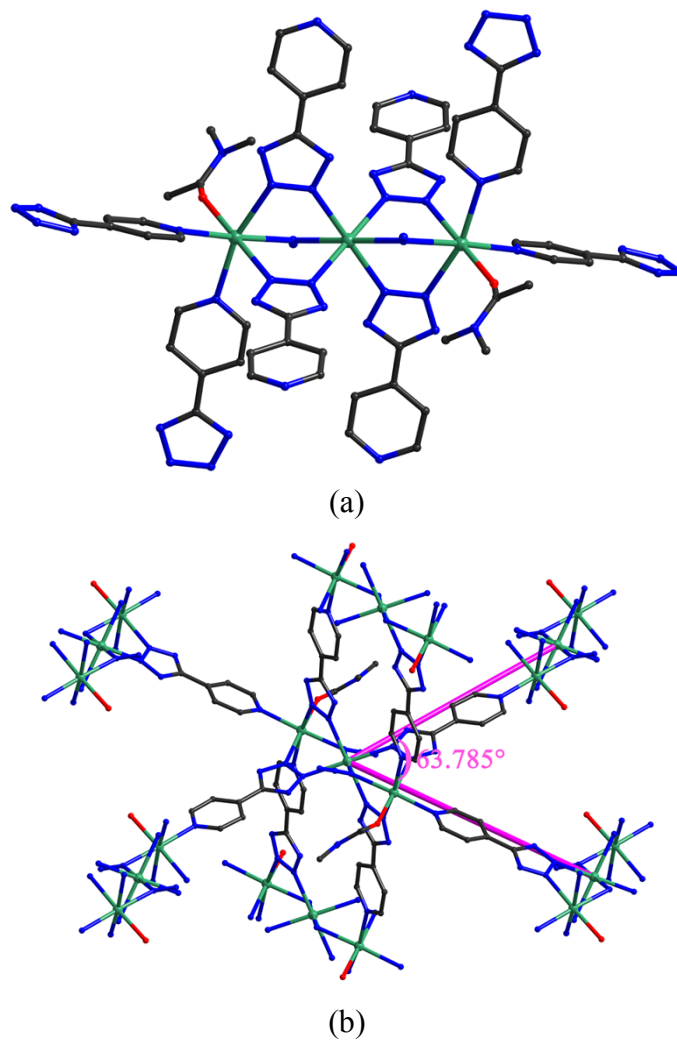

**Fig. S4** (a) View of 6-connected node in **4**. (b) View of angle  $\eta$  with corresponding value.

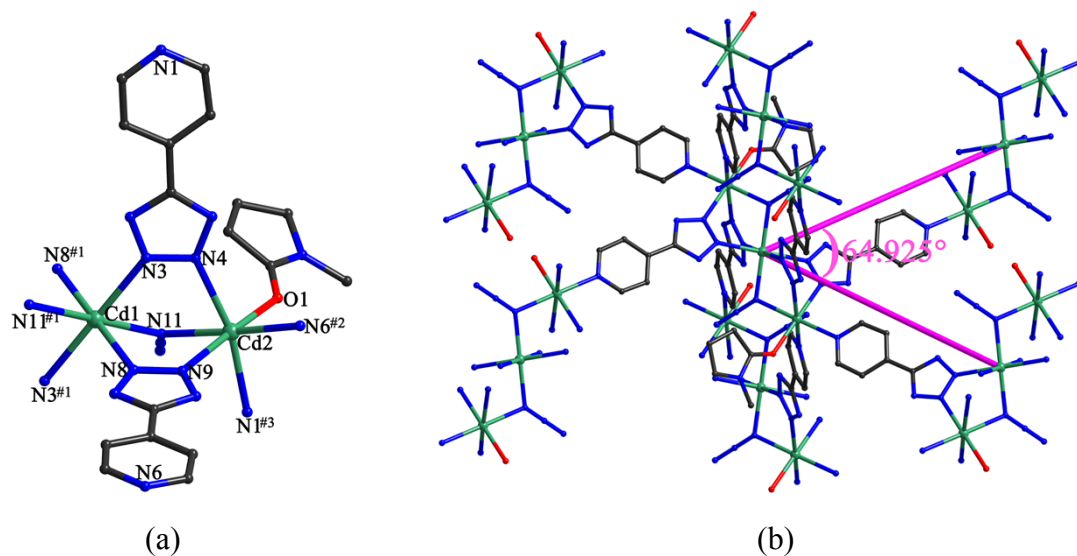

**Fig. S5** (a) Coordination environments of Cd(II) cations in **5**. (b) View of angle  $\eta$  with corresponding value.

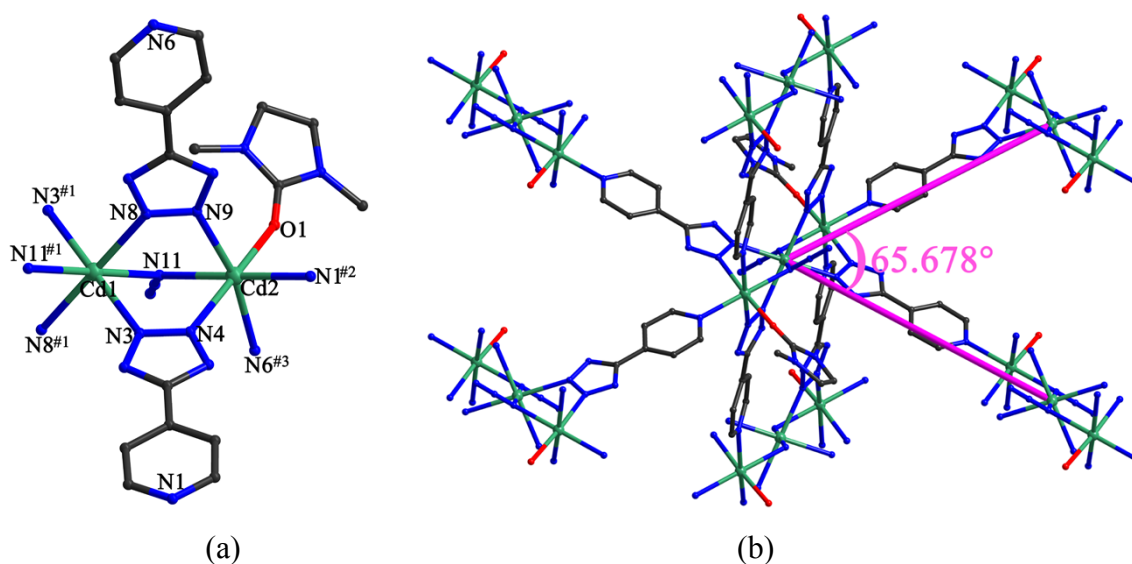

**Fig. S6** (a) Coordination environments of Cd(II) cations in **6**. (b) View of angle  $\eta$  with corresponding value.

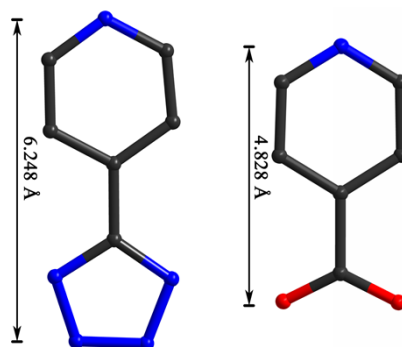

Fig. S7 The lengths of TP anion and HIN anion.

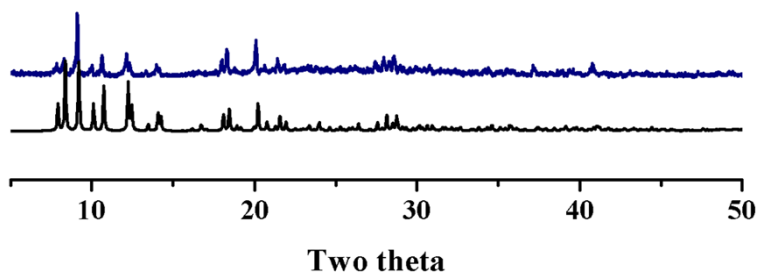

(1)

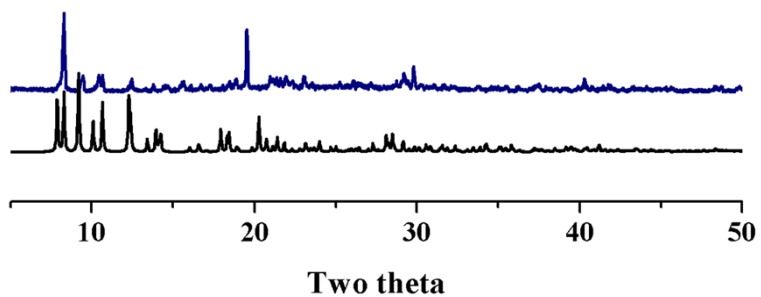

(2)

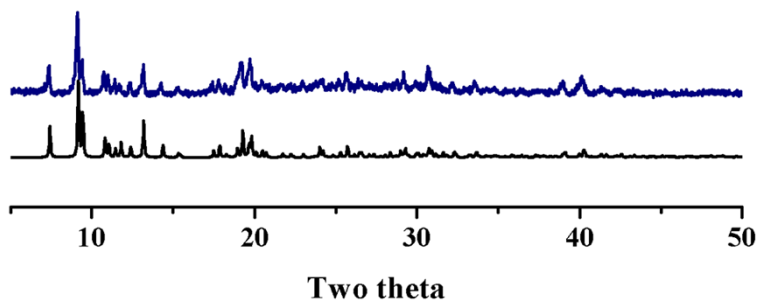

(3)

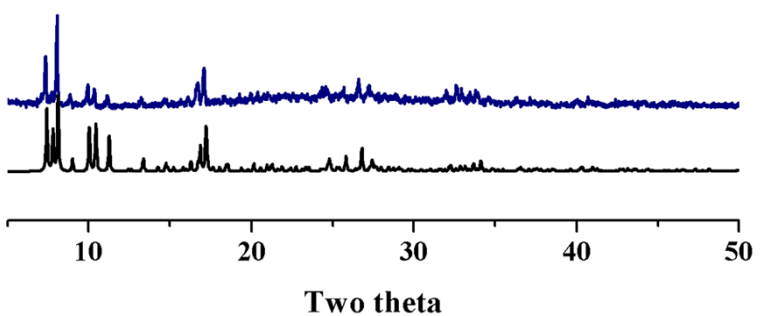

(4)

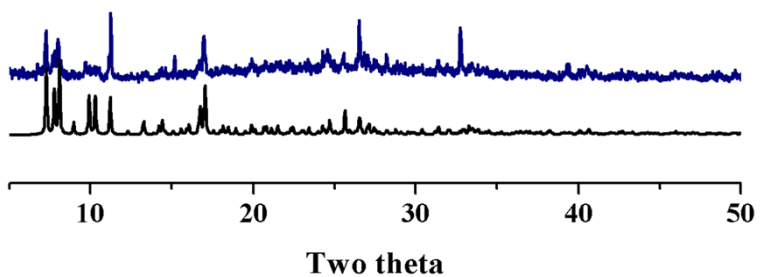

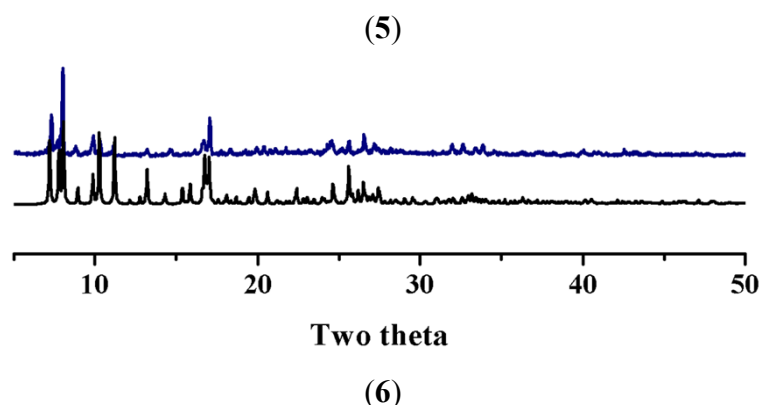

**Fig. S8** The simulated (black) and experimental (blue) PXRD patterns for compounds **1-6**.

### Luminescent Properties

Luminescent properties of MOFs based Cd(II) cation have attracted much interest because of their potential applications in chemical sensors, electroluminescent display, and photochemistry.<sup>1</sup> The solid-state photoluminescent properties of free HIN and compounds **1-6** were investigated at room temperature (Fig. S9). It can be seen that upon excitation at 322 nm, compounds **1-3** display three strong emission peaks at 425 nm, 435 nm, and 430 nm, respectively, which can probably be attributed to the intraligand fluorescent emissions.<sup>2</sup> There are blue shifts of *ca.* 25 nm, 15 nm, and 20 nm compared with the emission of free HIN ( $\lambda_{em} = 450$  nm), which may be because of the coordination effects of IN anions to Cd(II) cations. The process can increase the ligand conformational rigidity and reduce the nonradiative decay of the intraligand.<sup>3</sup> Upon excitation at 313 nm, compounds **4-6** show emission peaks at 442 nm, 440 nm, and 453 nm, respectively. The emission peaks of these compounds also can be assigned to an intraligand fluorescent emission of TP anion ( $\lambda_{em} = 353$  nm for HTP).<sup>4</sup> However, the emission peaks are red-shifted compared to the free HTP, which may be due to the deprotonation of the HTP ligands after coordinating to Cd(II) ions.<sup>5</sup>

### References

- 1 (a) S. Dang, X. Min, W. Yang, F.-Y. Yi, H. You and Z.-M. Sun, *Chem. Eur. J.*, 2013, **19**, 17172; (b) S. S. Nagarkar, B. Joarder, A. K. Chaudhari, S. Mukherjee and S. K. Ghosh, *Angew. Chem. Int. Ed.*, 2013, **54**, 2881; (c) G. D. Santis, L. Fabbri, M. Licchelli, A. Poggi and A. Taglietti, *Angew. Chem. Int. Ed.*, 1996, **35**, 202; (d) J. E. Mcgarrah, Y. J. Kim, M. Hissler and R. Eisenberg, *Inorg. Chem.*, 2001, **40**, 4510.

- 2 (a) L. Zhou, Y.-S. Xue, Y. Xu, J. Zhang and H.-B. Du, *CrystEngComm*, 2013, **15**, 7315; (b) N. Xu, J. Yang, Y.-C. He, Y.-Y. Liu and J.-F. Ma, *CrystEngComm*, 2013, **15**, 7360; (c) X. J. Zhang, L. P. Jin and S. Gao, *Inorg. Chem.*, 2004, **43**, 1600.
- 3 (a) H. Yersin and A. Vogler, *Photochemistry and Photophysics of Coordination Compounds*; Springer: Berlin, 1987; (b) B. Valeur, *Molecular Fluorescence: Principles and Application*; Wiley-VCH: Weinheim, 2002.
- 4 (a) C. Jiang, Z.-P. Yu, S.-J. Wang, C. Jiao, J.-M. Li, Z.-Y. Wang and Y. Cui, *Eur. J. Inorg. Chem.*, 2004, 3662; (b) Y.-T. Yang, F.-H. Zhao, Y.-X. Che and J.-M. Zheng, *Inorg. Chem. Commun.*, 2011, **14**, 1855.
- 5 (a) L.-P. Zhang, J.-F. Ma, J. Yang, Y.-Y. Pang and J.-C. Ma, *Inorg. Chem.*, 2010, **49**, 1535; (b) F. Yuan, J. Xie, H.-M. Hu, C.-M. Yuan, B. Xu, M.-L. Yang, F.-X. Dong and G.-L. Xue, *CrystEngComm*, 2013, **15**, 1460.

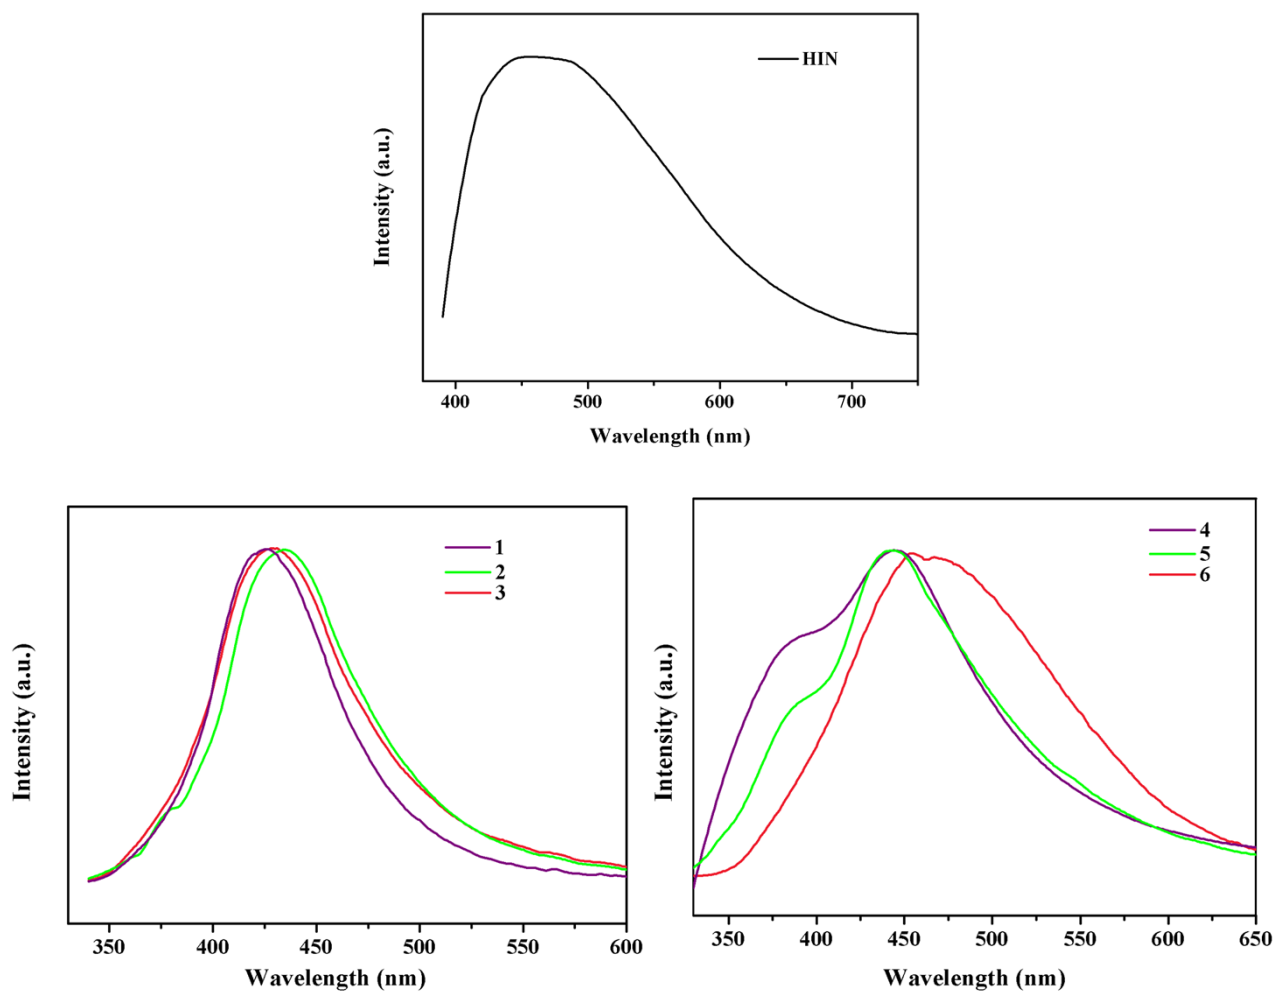

**Fig. S9** Emission spectra of HIN and compounds 1-6.

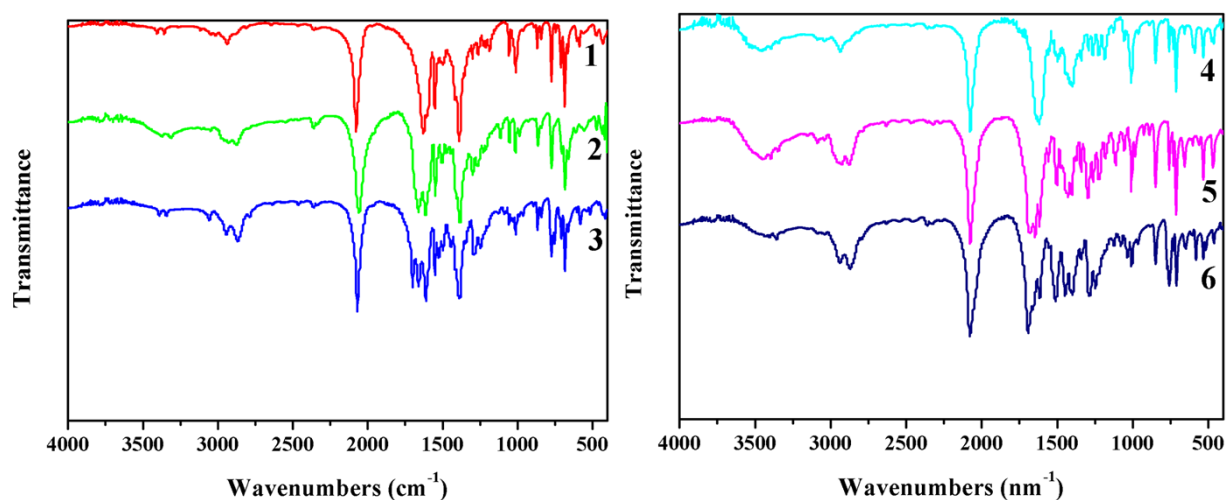

**Fig. S10** IR spectra of compounds **1-6**.

**Table S1.** Selected bond distances (Å) and angles (°) for **1**.

|                     |           |                     |          |
|---------------------|-----------|---------------------|----------|
| Cd(1)-O(3)#1        | 2.250(5)  | Cd(1)-N(3)          | 2.253(6) |
| Cd(2)-O(2)          | 2.241(5)  | Cd(1)-O(1)          | 2.305(5) |
| Cd(2)-O(4)#1        | 2.258(5)  | Cd(2)-N(3)          | 2.272(5) |
| Cd(2)-N(1)#3        | 2.310(6)  | Cd(2)-O(5)          | 2.327(5) |
| Cd(2)-N(2)          | 2.409(6)  | O(3)#1-Cd(1)-N(3)   | 90.8(2)  |
| O(3)#1-Cd(1)-O(1)   | 88.6(2)   | N(3)-Cd(1)-O(1)     | 94.0(2)  |
| O(3)#1-Cd(1)-O(1)#2 | 91.4(2)   | O(2)-Cd(2)-O(4)#1   | 91.9(2)  |
| O(2)-Cd(2)-N(3)     | 98.4(2)   | O(4)#1-Cd(2)-N(3)   | 95.6(2)  |
| O(2)-Cd(2)-N(1)#3   | 86.31(19) | O(4)#1-Cd(2)-N(1)#3 | 88.2(2)  |
| N(3)-Cd(2)-N(1)#3   | 173.8(2)  | O(2)-Cd(2)-O(5)     | 169.0(2) |
| O(4)#1-Cd(2)-O(5)   | 95.3(2)   | N(3)-Cd(2)-O(5)     | 89.3(2)  |
| N(1)#3-Cd(2)-O(5)   | 85.57(19) | O(2)-Cd(2)-N(2)     | 85.1(2)  |
| O(4)#1-Cd(2)-N(2)   | 176.9(2)  | N(3)-Cd(2)-N(2)     | 85.1(2)  |
| N(1)#3-Cd(2)-N(2)   | 91.3(2)   | O(5)-Cd(2)-N(2)     | 87.6(2)  |

Symmetry transformations used to generate equivalent atoms: #1  $-x+1, -y, -z+1$ ; #2  $-x, -y, -z$ ; #3  $x, -y+1/2, z+1/2$ .

**Table S2.** Selected bond distances (Å) and angles (°) for **2**.

|            |          |            |          |
|------------|----------|------------|----------|
| Cd(1)-N(3) | 2.249(3) | Cd(1)-O(3) | 2.249(3) |
|------------|----------|------------|----------|



|                     |            |                   |           |
|---------------------|------------|-------------------|-----------|
| Cd(1)-O(1)          | 2.306(2)   | Cd(2)-O(2)        | 2.243(2)  |
| Cd(2)-O(4)          | 2.260(2)   | Cd(2)-N(3)        | 2.263(3)  |
| Cd(2)-O(5)          | 2.333(2)   | Cd(2)-N(2)#3      | 2.413(3)  |
| N(3)#1-Cd(1)-O(3)   | 89.27(10)  | N(3)#1-Cd(1)-O(1) | 85.54(10) |
| O(3)-Cd(1)-O(1)     | 86.76(12)  | O(2)-Cd(2)-O(4)   | 91.86(10) |
| O(2)-Cd(2)-N(3)     | 98.38(9)   | O(4)-Cd(2)-N(3)   | 95.39(10) |
| O(2)-Cd(2)-N(1)#2   | 86.36(9)   | O(4)-Cd(2)-N(1)#2 | 89.24(10) |
| N(3)-Cd(2)-N(1)#2   | 173.25(10) | O(2)-Cd(2)-O(5)   | 168.23(9) |
| N(1)#2-Cd(2)-O(5)   | 84.31(9)   | O(2)-Cd(2)-N(2)#3 | 86.49(10) |
| O(4)-Cd(2)-N(2)#3   | 177.78(9)  | N(3)-Cd(2)-N(2)#3 | 83.38(10) |
| N(1)#2-Cd(2)-N(2)#3 | 92.15(10)  | O(5)-Cd(2)-N(2)#3 | 86.70(11) |

Symmetry transformations used to generate equivalent atoms: #1 -x+1,-y,-z+1; #2 x,-y-1/2,z+1/2; #3 x-1,y,z.

**Table S3.** Selected bond distances (Å) and angles (°) for **3**.

|                     |            |                     |            |
|---------------------|------------|---------------------|------------|
| Cd(1)-N(3)          | 2.262(4)   | Cd(1)-O(3)          | 2.270(3)   |
| Cd(1)-O(1)          | 2.307(3)   | Cd(2)-O(2)          | 2.231(3)   |
| Cd(2)-O(4)          | 2.291(3)   | Cd(2)-N(3)          | 2.291(4)   |
| Cd(2)-N(2)#2        | 2.331(4)   | Cd(2)-O(5)          | 2.341(3)   |
| Cd(2)-N(1)#3        | 2.387(4)   | N(3)#1-Cd(1)-O(3)   | 89.89(14)  |
| N(3)#1-Cd(1)-O(1)   | 86.97(14)  | O(3)-Cd(1)-O(1)     | 86.51(13)  |
| N(3)#1-Cd(1)-O(1)#1 | 93.03(14)  | O(3)-Cd(1)-O(1)#1   | 93.49(13)  |
| O(2)-Cd(2)-O(4)     | 97.46(13)  | O(2)-Cd(2)-N(3)     | 99.23(14)  |
| O(4)-Cd(2)-N(3)     | 91.29(13)  | O(2)-Cd(2)-N(2)#2   | 162.96(12) |
| O(4)-Cd(2)-N(2)#2   | 89.21(13)  | N(3)-Cd(2)-N(2)#2   | 96.26(14)  |
| O(2)-Cd(2)-O(5)     | 81.19(12)  | O(4)-Cd(2)-O(5)     | 88.18(12)  |
| N(3)-Cd(2)-O(5)     | 179.36(14) | N(2)#2-Cd(2)-O(5)   | 83.38(13)  |
| O(2)-Cd(2)-N(1)#3   | 84.26(14)  | O(4)-Cd(2)-N(1)#3   | 177.33(13) |
| N(3)-Cd(2)-N(1)#3   | 86.41(14)  | N(2)#2-Cd(2)-N(1)#3 | 89.69(14)  |

Symmetry transformations used to generate equivalent atoms: #1 -x,-y,-z; #2 x,-y-1/2,z-1/2; #3 x+1,y,z.

**Table S4.** Selected bond distances (Å) and angles (°) for **4**.

|             |          |              |          |
|-------------|----------|--------------|----------|
| Cd(1)-N(11) | 2.293(4) | Cd(1)-N(8)   | 2.313(5) |
| Cd(1)-N(3)  | 2.322(4) | Cd(2)-N(6)#2 | 2.275(5) |

|                      |            |                     |           |
|----------------------|------------|---------------------|-----------|
| Cd(2)-N(11)          | 2.276(5)   | Cd(2)-O(1)          | 2.283(4)  |
| Cd(2)-N(1)#3         | 2.368(4)   | Cd(2)-N(9)          | 2.377(4)  |
| Cd(2)-N(4)           | 2.402(4)   | N(11)#1-Cd(1)-N(8)  | 92.84(17) |
| N(11)#1-Cd(1)-N(3)#1 | 82.80(17)  | N(8)-Cd(1)-N(3)#1   | 94.74(17) |
| N(11)#1-Cd(1)-N(3)   | 97.20(17)  | N(8)-Cd(1)-N(3)     | 85.26(17) |
| N(6)#2-Cd(2)-N(11)   | 176.87(17) | N(6)#2-Cd(2)-O(1)   | 87.16(17) |
| N(11)-Cd(2)-O(1)     | 92.23(17)  | N(6)#2-Cd(2)-N(1)#3 | 96.18(17) |
| N(11)-Cd(2)-N(1)#3   | 86.93(17)  | O(1)-Cd(2)-N(1)#3   | 95.01(18) |
| N(6)#2-Cd(2)-N(9)    | 94.47(17)  | N(11)-Cd(2)-N(9)    | 86.21(17) |
| O(1)-Cd(2)-N(9)      | 177.98(18) | N(1)#3-Cd(2)-N(9)   | 83.64(16) |
| N(6)#2-Cd(2)-N(4)    | 92.76(16)  | N(11)-Cd(2)-N(4)    | 84.28(16) |
| N(1)#3-Cd(2)-N(4)    | 164.57(15) | N(9)-Cd(2)-N(4)     | 83.14(15) |

Symmetry transformations used to generate equivalent atoms: #1 -x,-y,-z; #2 x,-y+1/2,z-1/2; #3 x-1,y,z.

**Table S5.** Selected bond distances (Å) and angles (°) for **5**.

|                     |            |                     |           |
|---------------------|------------|---------------------|-----------|
| Cd(1)-N(11)         | 2.294(3)   | Cd(1)-N(8)#1        | 2.333(3)  |
| Cd(1)-N(3)#1        | 2.341(3)   | Cd(2)-O(1)          | 2.284(3)  |
| Cd(2)-N(6)#2        | 2.303(3)   | Cd(2)-N(11)         | 2.313(3)  |
| Cd(2)-N(1)#3        | 2.375(3)   | Cd(2)-N(9)          | 2.392(3)  |
| Cd(2)-N(4)          | 2.402(3)   | N(11)-Cd(1)-N(8)#1  | 92.99(11) |
| N(11)-Cd(1)-N(3)#1  | 96.99(12)  | N(8)#1-Cd(1)-N(3)#1 | 85.58(12) |
| N(11)-Cd(1)-N(3)    | 83.01(12)  | N(8)#1-Cd(1)-N(3)   | 94.42(12) |
| O(1)-Cd(2)-N(6)#2   | 86.50(11)  | O(1)-Cd(2)-N(11)    | 92.72(12) |
| N(6)#2-Cd(2)-N(11)  | 177.46(13) | O(1)-Cd(2)-N(1)#3   | 92.06(13) |
| N(6)#2-Cd(2)-N(1)#3 | 95.86(12)  | N(11)-Cd(2)-N(1)#3  | 86.58(12) |
| O(1)-Cd(2)-N(9)     | 176.78(13) | N(6)#2-Cd(2)-N(9)   | 94.90(11) |
| N(11)-Cd(2)-N(9)    | 86.00(11)  | N(1)#3-Cd(2)-N(9)   | 84.91(11) |
| O(1)-Cd(2)-N(4)     | 98.43(12)  | N(6)#2-Cd(2)-N(4)   | 93.66(12) |
| N(11)-Cd(2)-N(4)    | 84.05(12)  | N(9)-Cd(2)-N(4)     | 84.39(11) |

Symmetry transformations used to generate equivalent atoms: #1 -x+1,-y,-z; #2 x,-y-1/2,z+1/2; #3 x+1,y,z.

**Table S6.** Selected bond distances (Å) and angles (°) for **6**.

|             |          |            |          |
|-------------|----------|------------|----------|
| Cd(1)-N(11) | 2.283(2) | Cd(1)-N(8) | 2.331(2) |
|-------------|----------|------------|----------|

|                     |           |                    |           |
|---------------------|-----------|--------------------|-----------|
| Cd(1)-N(3)          | 2.358(2)  | Cd(2)-N(11)        | 2.290(2)  |
| Cd(2)-N(1)#2        | 2.308(2)  | Cd(2)-O(1)         | 2.315(2)  |
| Cd(2)-N(6)#3        | 2.376(3)  | Cd(2)-N(9)         | 2.414(2)  |
| Cd(2)-N(4)          | 2.423(2)  | N(11)-Cd(1)-N(8)   | 83.86(9)  |
| N(11)-Cd(1)-N(3)#1  | 94.07(8)  | N(8)-Cd(1)-N(3)#1  | 95.62(9)  |
| N(11)-Cd(1)-N(3)    | 85.93(8)  | N(8)-Cd(1)-N(3)    | 84.38(9)  |
| N(11)-Cd(2)-N(1)#2  | 179.65(9) | N(11)-Cd(2)-O(1)   | 92.25(8)  |
| N(1)#2-Cd(2)-O(1)   | 87.58(8)  | N(11)-Cd(2)-N(6)#3 | 86.31(9)  |
| N(1)#2-Cd(2)-N(6)#3 | 94.00(9)  | O(1)-Cd(2)-N(6)#3  | 91.30(9)  |
| N(11)-Cd(2)-N(9)    | 85.87(8)  | N(1)#2-Cd(2)-N(9)  | 93.86(9)  |
| O(1)-Cd(2)-N(9)     | 99.64(9)  | N(6)#3-Cd(2)-N(9)  | 166.78(8) |
| N(11)-Cd(2)-N(4)    | 84.88(8)  | N(1)#2-Cd(2)-N(4)  | 95.29(8)  |
| N(6)#3-Cd(2)-N(4)   | 86.46(9)  | N(9)-Cd(2)-N(4)    | 82.25(8)  |

Symmetry transformations used to generate equivalent atoms: #1 -x,-y,-z; #2 x,-y-1/2,z+1/2; #3 x+1,y,z.
